# Supplementary material for: A hydrostable samarium(iii)-MOF sensor for the sensitive and selective detection of tryptophan based on a “dual antenna effect”
Source: Royal Society of Chemistry journal article supplement (doi:10.1039/d1ay01050f), 2021-01-01
Supplement: d1ay01050f1.pdf [file d1ay01050f1.pdf]

Supplementary Information for

**A hydrostable samarium (III)-MOF sensor for the sensitive and selective  
detection of tryptophan based on “dual antenna effect”**

Xiao-Yang Zhao <sup>a</sup>, Jia Wang <sup>a</sup>, Qi-Shan Yang<sup>\*a</sup>, Dong-Lei Fu <sup>a</sup> and Dao-Kuan Jiang <sup>a</sup>

School of Chemistry and Chemical Engineering, Inner Mongolia University of Science and  
Technology, Baotou 014000, China, E-mail: yqs63@sina.com

**Table S1.** Selected bond lengths (Å) and angles (°) of Sm-MOF.

| <b>[Sm<sub>2</sub>(BTEC)<sub>1.5</sub>(H<sub>2</sub>O)<sub>8</sub>]·6H<sub>2</sub>O</b> |            |                |            |
|-----------------------------------------------------------------------------------------|------------|----------------|------------|
| Sm1-O6#1                                                                                | 2.4949(16) | Sm2-O7#3       | 2.6062(17) |
| Sm1-O1                                                                                  | 2.4504(16) | Sm2-O9         | 2.3939(16) |
| Sm1-O1#2                                                                                | 2.6059(16) | Sm2-O16        | 2.4444(18) |
| Sm1-O3                                                                                  | 2.4178(17) | Sm2-O20        | 2.4187(19) |
| O6#1-Sm1-O1#2                                                                           | 153.71(5)  | O9- Sm2-O7#3   | 129.95(6)  |
| O1- Sm1-O6#1                                                                            | 118.12(5)  | O9- Sm2-O16    | 74.29(6)   |
| O1- Sm1-O1#2                                                                            | 66.61(6)   | O9- Sm2-O20    | 69.63(6)   |
| O1- Sm1-O5#1                                                                            | 82.56(6)   | O9- Sm2-O8#3   | 145.32(6)  |
| O1- Sm1-O13                                                                             | 67.64(6)   | O9- Sm2-O4     | 74.65(6)   |
| O1- Sm1-O2#2                                                                            | 107.97(6)  | O9- Sm2-O17    | 133.01(6)  |
| O3- Sm1-O6#1                                                                            | 74.26(6)   | O9- Sm2-O19    | 114.63(6)  |
| O3- Sm1-O1                                                                              | 68.21(6)   | O9- Sm2-O18    | 68.15(6)   |
| O3- Sm1-O1#2                                                                            | 85.16(5)   | O16- Sm2-O7#3  | 68.51(6)   |
| O3- Sm1-O5#1                                                                            | 93.39(6)   | O16- Sm2-O8#3  | 76.64(6)   |
| O3- Sm1-O13                                                                             | 135.60(6)  | O16- Sm2-O4    | 71.82(7)   |
| O3- Sm1-O2#2                                                                            | 127.83(6)  | O16- Sm2-O17   | 135.57(7)  |
| O3- Sm1-O14                                                                             | 141.50(7)  | O16- Sm2-O18   | 141.58(7)  |
| O5#1- Sm1-O6#1                                                                          | 52.27(5)   | O20- Sm2-O7#3  | 75.69(6)   |
| O5#1- Sm1-O1#2                                                                          | 147.38(5)  | O20- Sm2-O16   | 86.41(8)   |
| O5#1- Sm1-O2#2                                                                          | 138.68(6)  | O20- Sm2-O4    | 142.07(6)  |
| O13- Sm1-O6#1                                                                           | 124.36(6)  | O20- Sm2-O17   | 76.58(7)   |
| O13- Sm1-O1#2                                                                           | 81.84(6)   | O20- Sm2-O19   | 137.46(7)  |
| O13- Sm1-O5#1                                                                           | 76.55(6)   | O20- Sm2-O18   | 73.47(7)   |
| O13- Sm1-O2#2                                                                           | 71.56(7)   | O8#3- Sm2-O7#3 | 51.23(5)   |
| O15- Sm1-O6#1                                                                           | 79.05(7)   | O8#3- Sm2-O17  | 81.48(6)   |
| O15- Sm1-O1#2                                                                           | 79.08(7)   | O8#3- Sm2-O18  | 141.39(6)  |
| O15- Sm1-O1                                                                             | 128.45(7)  | O4- Sm2-O7#3   | 121.08(5)  |
| O15- Sm1-O3                                                                             | 71.76(6)   | O4- Sm2-O8#3   | 78.65(6)   |

|               |           |             |           |
|---------------|-----------|-------------|-----------|
| O15- Sm1-O5#1 | 131.31(7) | O4- Sm2-O17 | 140.06(6) |
|---------------|-----------|-------------|-----------|

Symmetry Codes: #1 = 1-x, 1-y, -z; #2 = 1-x, -y, 1-z; #3 = 1+x, +y, +z; #4 = -1+x, +y, +z; #5 = 1-x, 1-y, 2-z

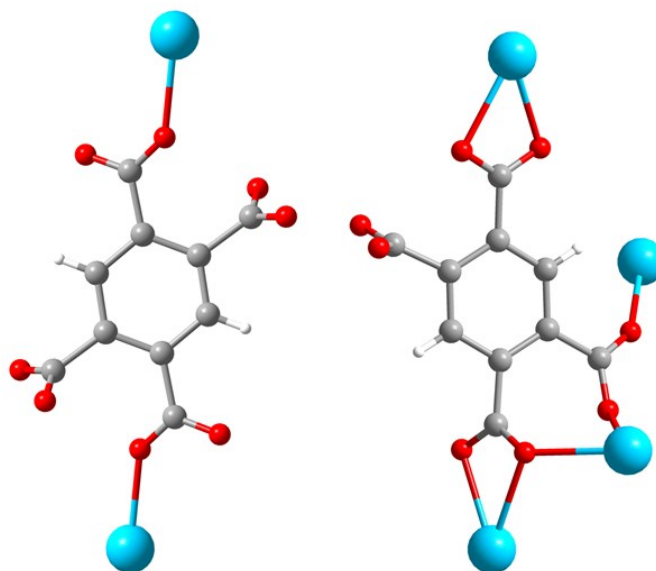

Fig. S1. Coordination mode for the H<sub>4</sub>BTEC ligand in Sm-MOF.

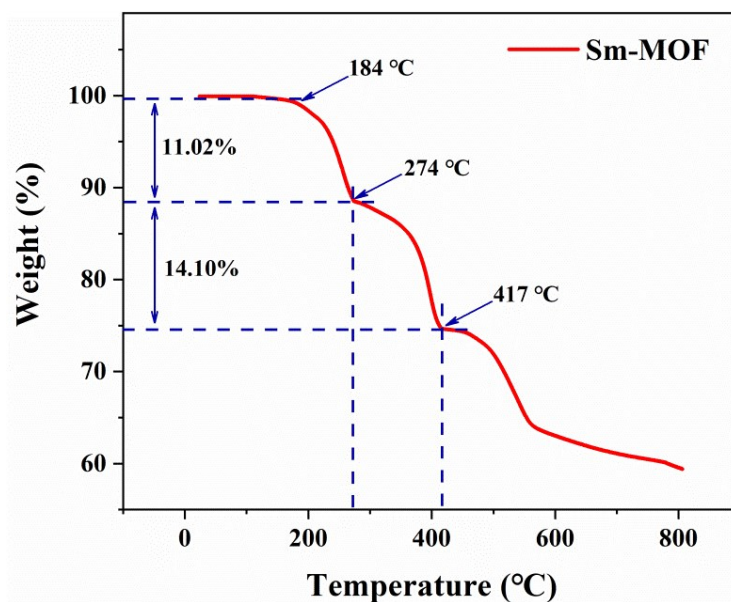

Fig. S2. The thermal gravimetric (TGA) curve of Sm-MOF.

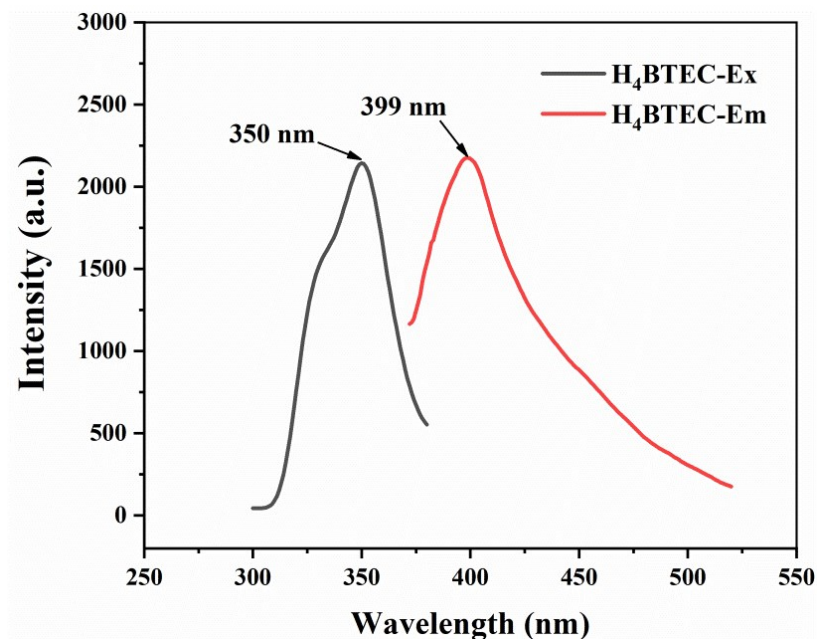

Fig. S3. The excitation and emission spectra of H<sub>4</sub>BTEC in the solid state.

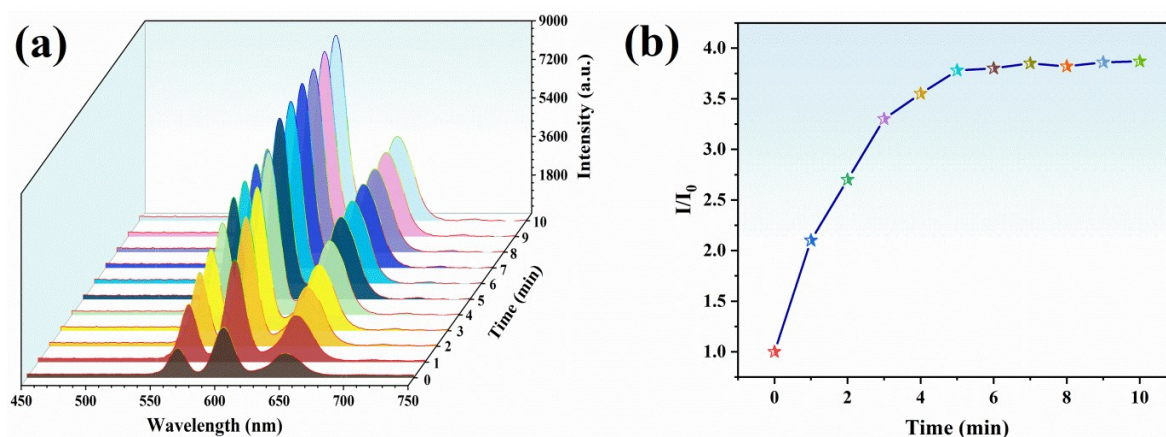

Fig. S4. (a) The emission spectra of Sm-MOF in 0-10 minutes after addition Trp; (b) The time-dependent fluorescence intensity curve of Sm-MOF suspension after adding Trp with a concentration of 80  $\mu\text{M}$ .

Table S2. Literature contrasts of the fluorescent sensors for sensing of Trp.

| Sensors                                                | Methods  | Solvents              | LOD             | Reference |
|--------------------------------------------------------|----------|-----------------------|-----------------|-----------|
| BTAP5                                                  | Turn-off | H <sub>2</sub> O/DMSO | 283 nM          | 35        |
| 3-APBA-HTCs                                            | Turn-off | PBS                   | 5 $\mu\text{M}$ | 36        |
| [Co(PS) <sub>4</sub> ](ClO <sub>4</sub> ) <sub>2</sub> | Turn-on  | PBS                   | 410 nM          | 37        |
| ZJU-108                                                | Turn-on  | Water                 | 43.4 nM         | 38        |

|        |             |       |        |                  |
|--------|-------------|-------|--------|------------------|
| Cu-CDs | Ratiometric | Water | 275 nM | 39               |
| Sm-MOF | Turn-on     | Water | 330 nM | <b>This work</b> |

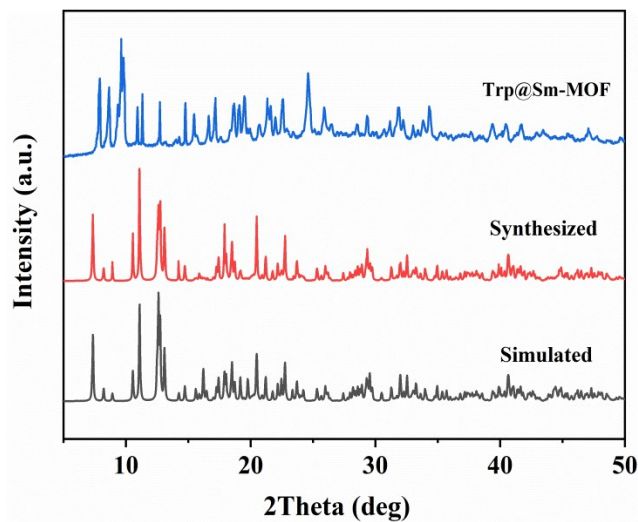

Fig. S5. PXR D spectrum of Trp interacting with Sm-MOF.

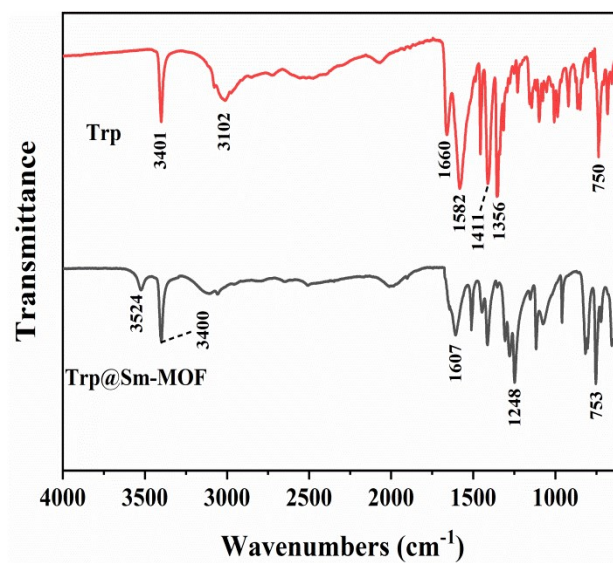

Fig. S6. (b) FT-IR spectra of Sm-MOF and Trp@Sm-MOF.
